# Supplementary material for: Copper(i)-catalysed azide–alkyne cycloaddition and antiproliferative activity of mono- and bis-1,2,3-triazole derivatives
Source: Royal Society of Chemistry journal article supplement (doi:10.1039/d0nj04308g), 2020-01-01
Supplement: d0nj04308g1.pdf [file d0nj04308g1.pdf]

# Copper(I)-catalysed azide–alkyne cycloaddition and antiproliferative activity of mono- and bis-1,2,3-triazole derivatives

Tamer El Malah,<sup>\*a</sup> Randa E. Abdel Mageid,<sup>a</sup> Hanem M. Awad<sup>b</sup> and Hany F. Nour<sup>\*a</sup>

<sup>a</sup>Photochemistry Department, Chemical Industries Research Division, National Research Centre, 33 El Buhouth Street, P.O. Box 12622, Cairo, Egypt.

<sup>b</sup>Department of Tanning Materials and Leather Technology, National Research Centre, 33 El Buhouth Street, P.O. Box 12311, Cairo, Egypt.

E-mails: tmara\_nrc3000@yahoo.com (Tamer El Malah) and hany.nour@daad-alumni.de (Hany F. Nour).

## Contents

|                                                                                                                            |           |
|----------------------------------------------------------------------------------------------------------------------------|-----------|
| <b>Figure S1.</b> <sup>1</sup> H NMR spectrum of mono-1,2,3-triazole <b>8</b> (400 MHz, CDCl <sub>3</sub> , 25 °C).....    | <b>2</b>  |
| <b>Figure S2.</b> <sup>13</sup> C NMR spectrum of mono-1,2,3-triazole <b>8</b> (100 MHz, CDCl <sub>3</sub> , 25 °C).....   | <b>2</b>  |
| <b>Figure S3.</b> <sup>1</sup> H NMR spectrum of mono-1,2,3-triazole <b>9</b> (400 MHz, CDCl <sub>3</sub> , 25 °C).....    | <b>3</b>  |
| <b>Figure S4.</b> <sup>13</sup> C NMR spectrum of mono-1,2,3-triazole <b>9</b> (100 MHz, CDCl <sub>3</sub> , 25 °C).....   | <b>3</b>  |
| <b>Figure S5.</b> <sup>1</sup> H NMR spectrum of mono-1,2,3-triazole <b>10</b> (400 MHz, CDCl <sub>3</sub> , 25 °C).....   | <b>4</b>  |
| <b>Figure S6.</b> <sup>13</sup> C NMR spectrum of mono-1,2,3-triazole <b>10</b> (100 MHz, CDCl <sub>3</sub> , 25 °C).....  | <b>4</b>  |
| <b>Figure S7.</b> <sup>1</sup> H NMR spectrum of mono-1,2,3-triazole <b>11</b> (400 MHz, CDCl <sub>3</sub> , 25 °C).....   | <b>5</b>  |
| <b>Figure S8.</b> <sup>13</sup> C NMR spectrum of mono-1,2,3-triazole <b>11</b> (100 MHz, CDCl <sub>3</sub> , 25 °C).....  | <b>5</b>  |
| <b>Figure S9.</b> <sup>1</sup> H NMR spectrum of mono-1,2,3-triazole <b>12</b> (400 MHz, CDCl <sub>3</sub> , 25 °C).....   | <b>6</b>  |
| <b>Figure S10.</b> <sup>13</sup> C NMR spectrum of mono-1,2,3-triazole <b>12</b> (100 MHz, CDCl <sub>3</sub> , 25 °C)..... | <b>6</b>  |
| <b>Figure S11.</b> <sup>1</sup> H NMR spectrum of mono-1,2,3-triazole <b>13</b> (400 MHz, CDCl <sub>3</sub> , 25 °C).....  | <b>7</b>  |
| <b>Figure S12.</b> <sup>13</sup> C NMR spectrum of mono-1,2,3-triazole <b>13</b> (100 MHz, CDCl <sub>3</sub> , 25 °C)..... | <b>7</b>  |
| <b>Figure S13.</b> <sup>1</sup> H NMR spectrum of bis-1,2,3-triazole <b>15</b> (400 MHz, CDCl <sub>3</sub> , 25 °C).....   | <b>8</b>  |
| <b>Figure S14.</b> <sup>13</sup> C NMR spectrum of bis-1,2,3-triazole <b>15</b> (100 MHz, CDCl <sub>3</sub> , 25 °C).....  | <b>8</b>  |
| <b>Figure S15.</b> <sup>1</sup> H NMR spectrum of bis-1,2,3-triazole <b>16</b> (400 MHz, CDCl <sub>3</sub> , 25 °C).....   | <b>9</b>  |
| <b>Figure S16.</b> <sup>13</sup> C NMR spectrum of bis-1,2,3-triazole <b>16</b> (100 MHz, CDCl <sub>3</sub> , 25 °C).....  | <b>9</b>  |
| <b>Figure S17.</b> <sup>1</sup> H NMR spectrum of bis-1,2,3-triazole <b>17</b> (400 MHz, CDCl <sub>3</sub> , 25 °C).....   | <b>10</b> |
| <b>Figure S18.</b> <sup>13</sup> C NMR spectrum of bis-1,2,3-triazole <b>17</b> (100 MHz, CDCl <sub>3</sub> , 25 °C).....  | <b>10</b> |
| <b>Figure S19.</b> <sup>1</sup> H NMR spectrum of bis-1,2,3-triazole <b>18</b> (400 MHz, CDCl <sub>3</sub> , 25 °C).....   | <b>11</b> |
| <b>Figure S20.</b> <sup>13</sup> C NMR spectrum of bis-1,2,3-triazole <b>18</b> (100 MHz, CDCl <sub>3</sub> , 25 °C).....  | <b>11</b> |
| <b>Figure S21.</b> <sup>1</sup> H NMR spectrum of bis-1,2,3-triazole <b>21</b> (400 MHz, CDCl <sub>3</sub> , 25 °C).....   | <b>12</b> |
| <b>Figure S22.</b> <sup>13</sup> C NMR spectrum of bis-1,2,3-triazole <b>21</b> (100 MHz, CDCl <sub>3</sub> , 25 °C).....  | <b>12</b> |
| <b>Figure S23.</b> <sup>1</sup> H NMR spectrum of bis-1,2,3-triazole <b>22</b> (400 MHz, CDCl <sub>3</sub> , 25 °C).....   | <b>13</b> |
| <b>Figure S24.</b> <sup>13</sup> C NMR spectrum of bis-1,2,3-triazole <b>22</b> (100 MHz, CDCl <sub>3</sub> , 25 °C).....  | <b>13</b> |

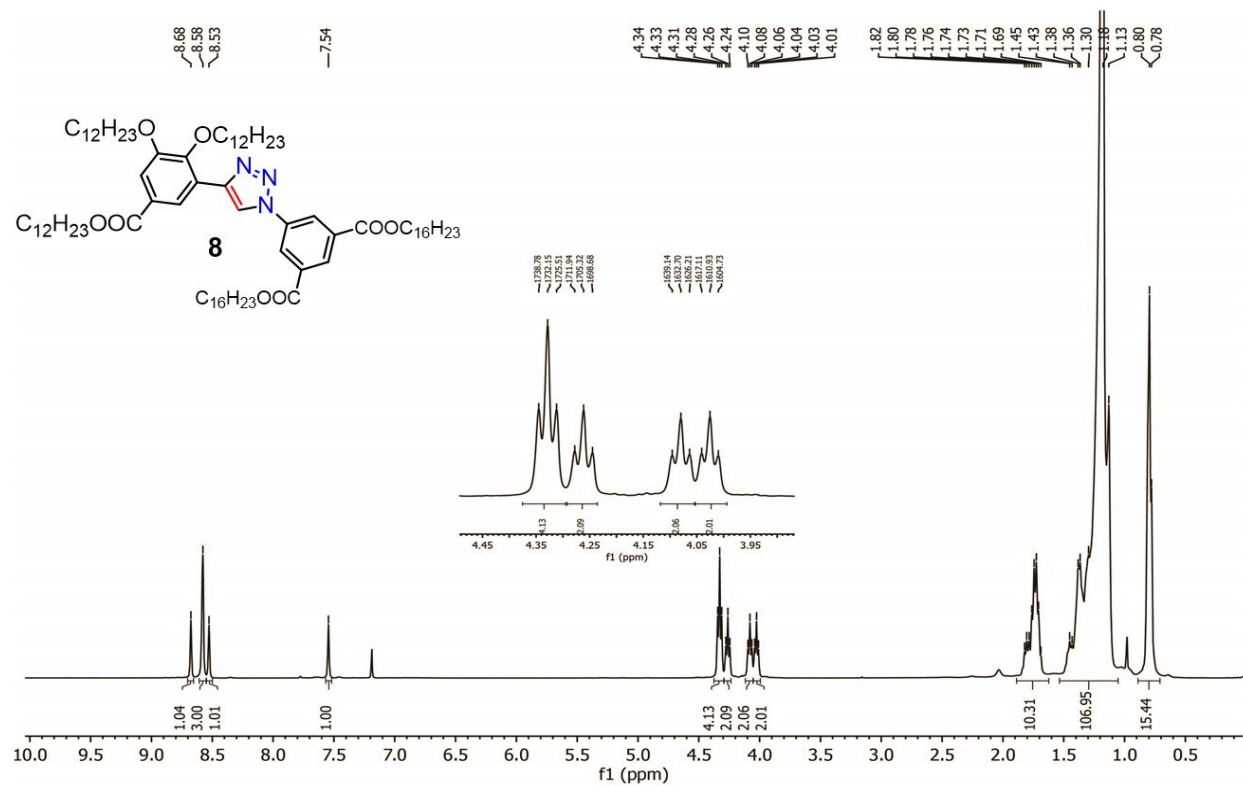

Figure S1.  $^1H$  NMR spectrum of mono-1,2,3-triazole **8** (400 MHz,  $CDCl_3$ , 25 °C).

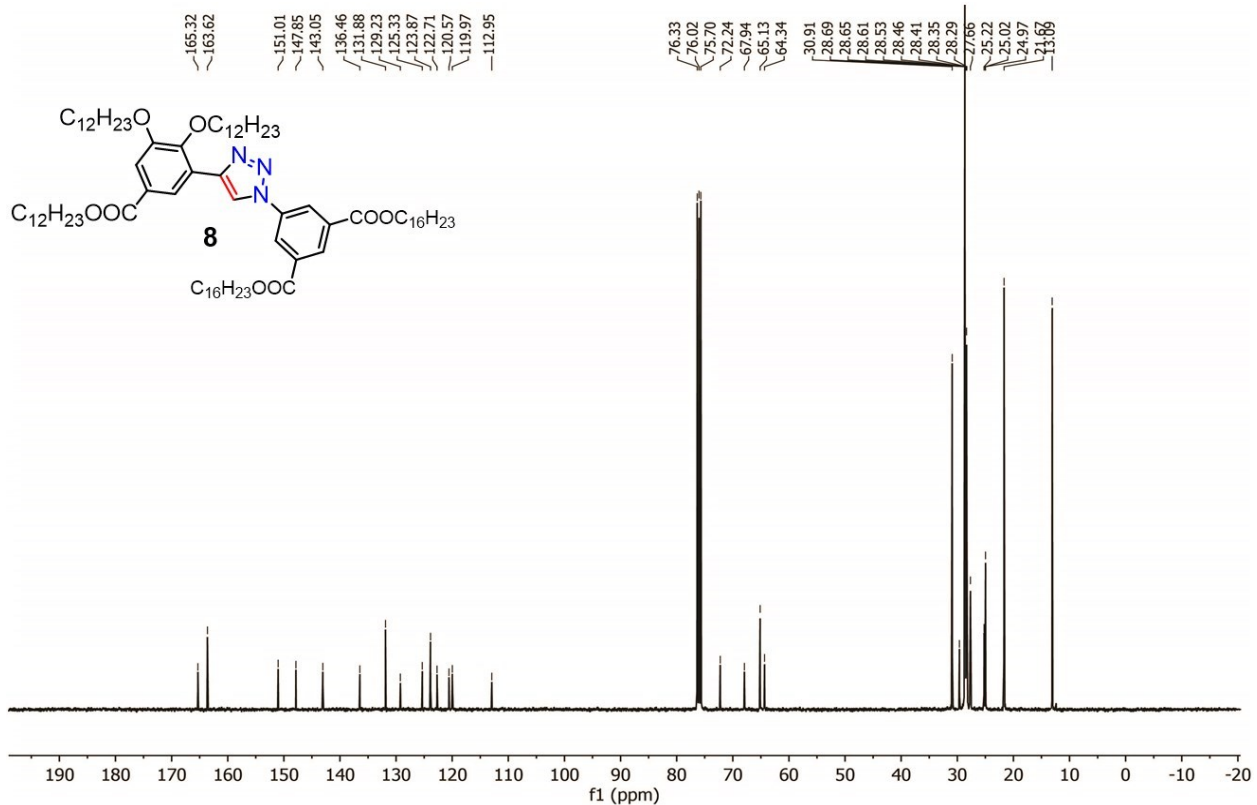

Figure S2.  $^{13}C$  NMR spectrum of mono-1,2,3-triazole **8** (100 MHz,  $CDCl_3$ , 25 °C).

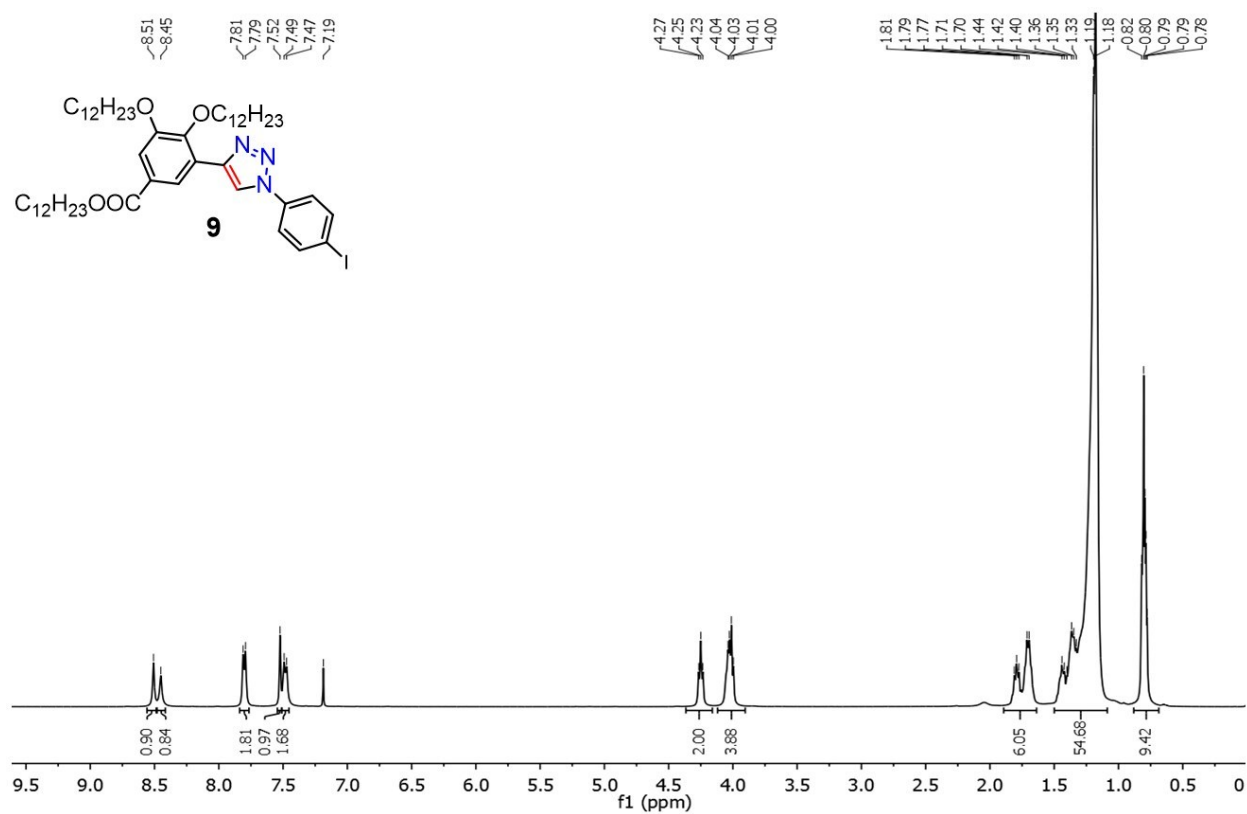

**Figure S3.**  $^1\text{H}$  NMR spectrum of mono-1,2,3-triazole **9** (400 MHz,  $\text{CDCl}_3$ , 25 °C).

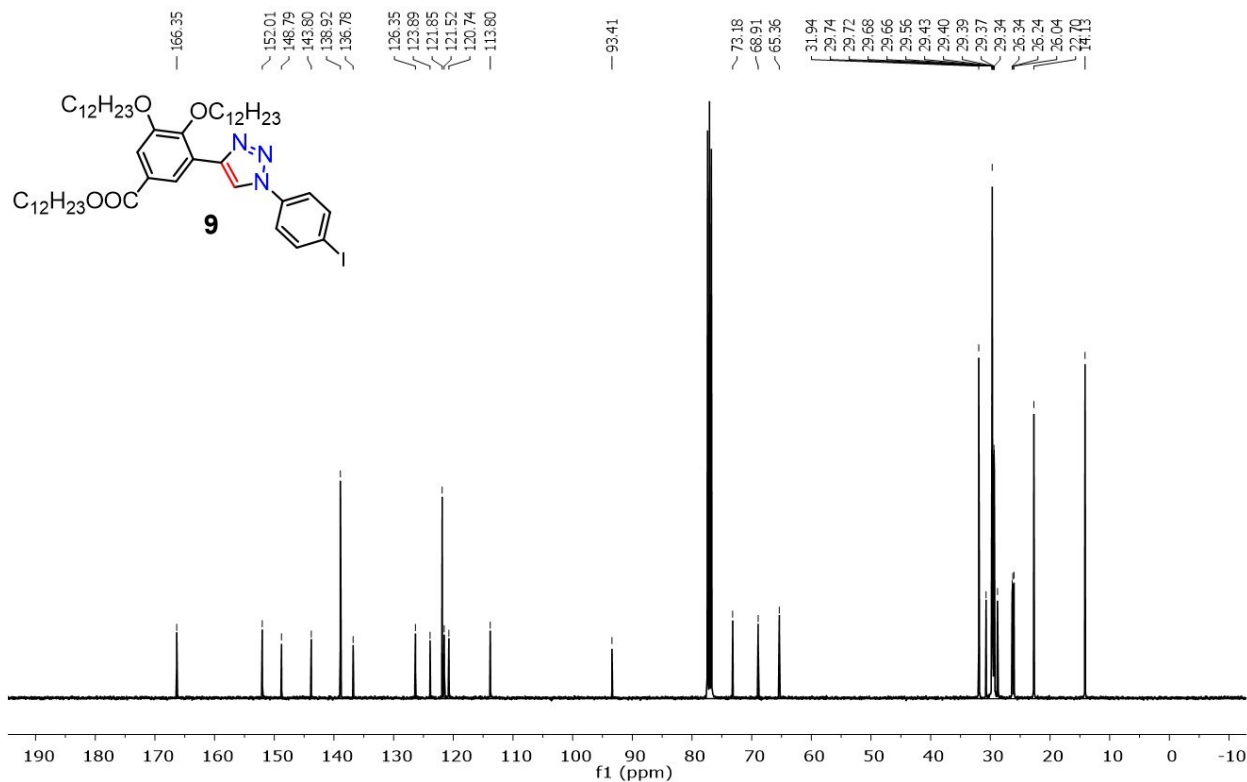

**Figure S4.**  $^{13}\text{C}$  NMR spectrum of mono-1,2,3-triazole **9** (100 MHz,  $\text{CDCl}_3$ , 25 °C).

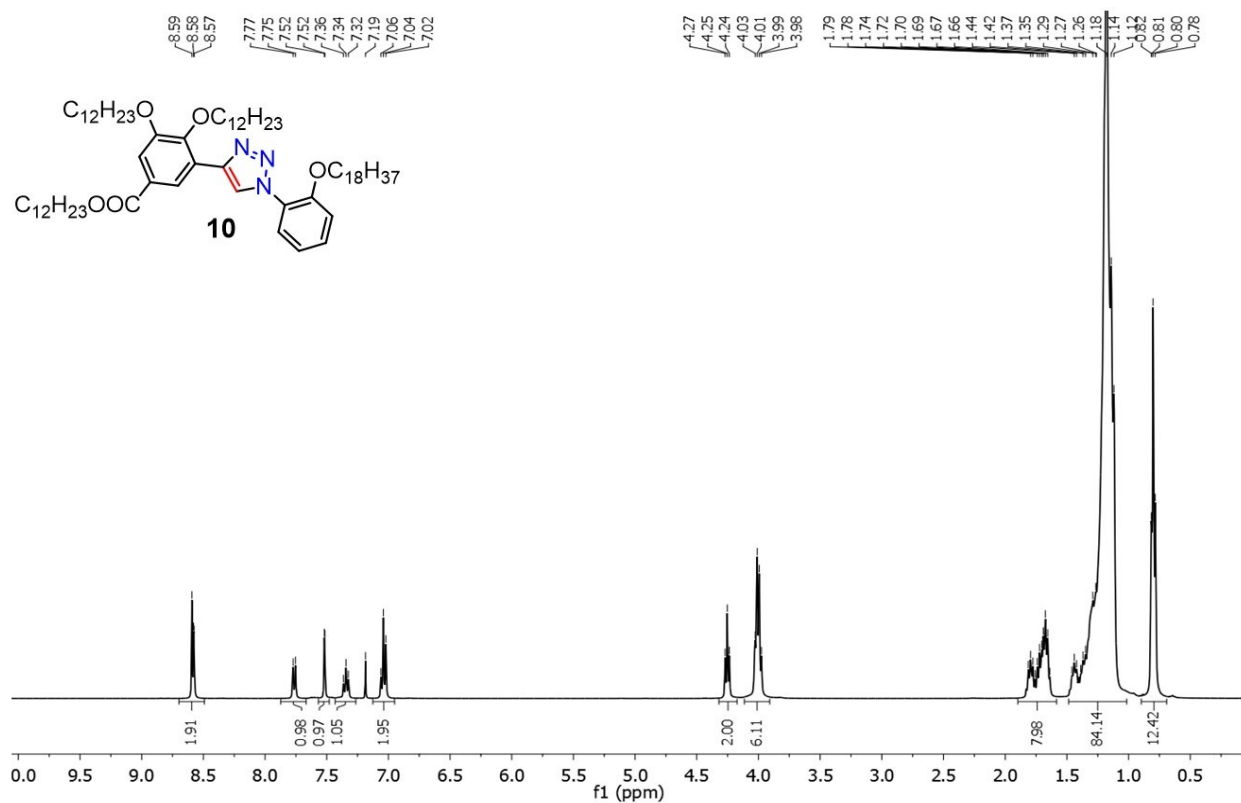

**Figure S5.** <sup>1</sup>H NMR spectrum of mono-1,2,3-triazole **10** (400 MHz, CDCl<sub>3</sub>, 25 °C).

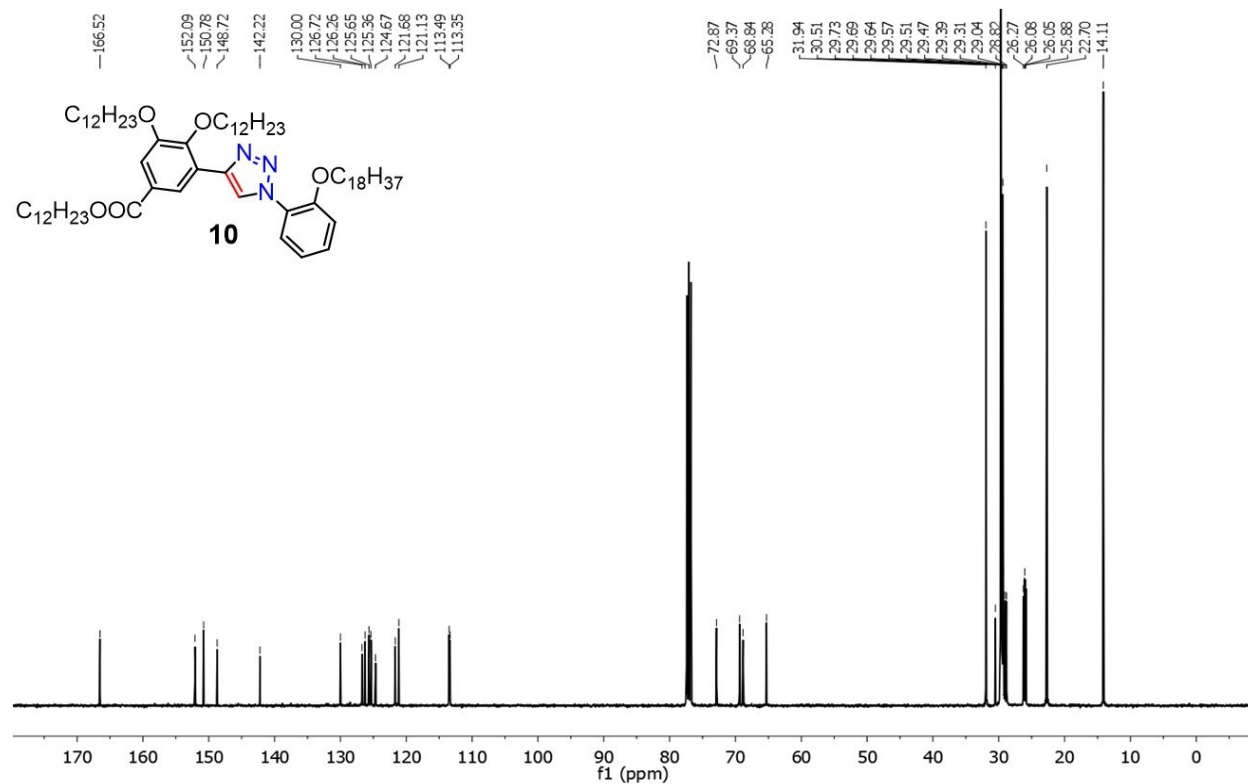

**Figure S6.** <sup>13</sup>C NMR spectrum of mono-1,2,3-triazole **10** (100 MHz, CDCl<sub>3</sub>, 25 °C).

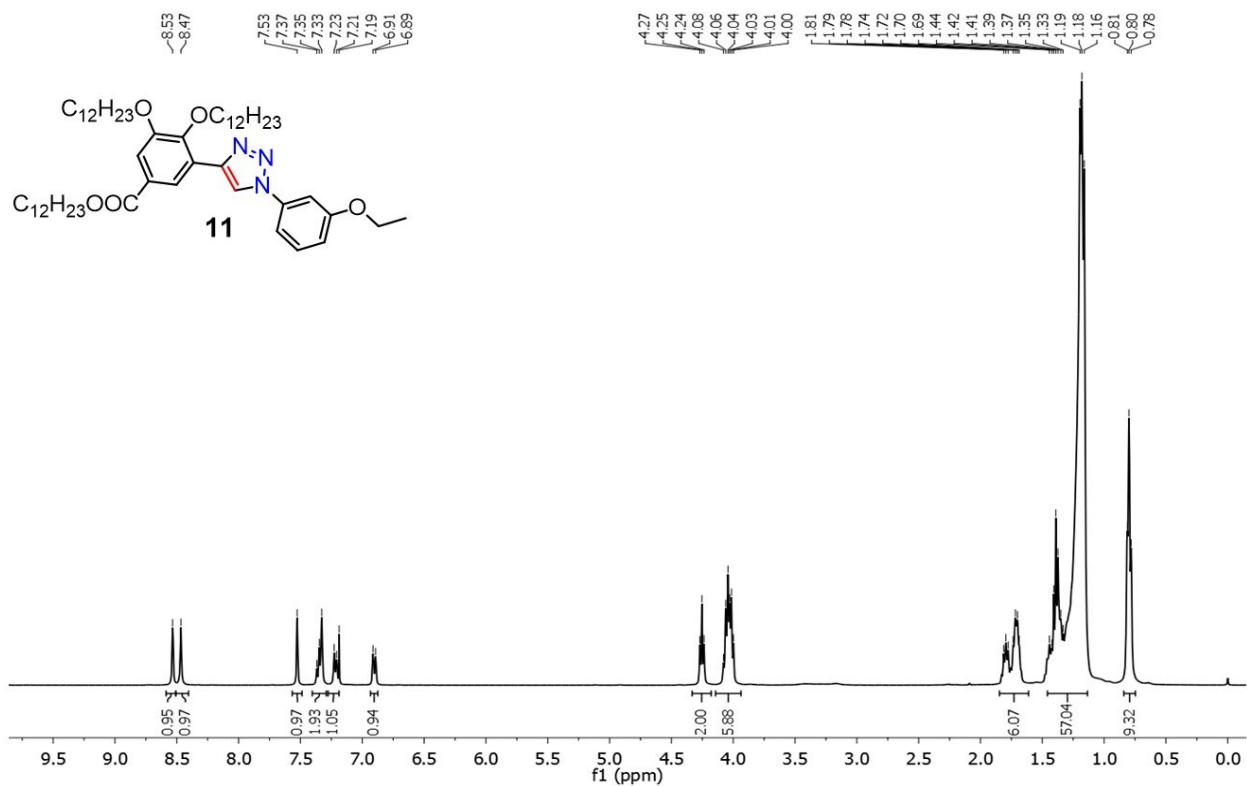

**Figure S7.** <sup>1</sup>H NMR spectrum of mono-1,2,3-triazole **11** (400 MHz, CDCl<sub>3</sub>, 25 °C).

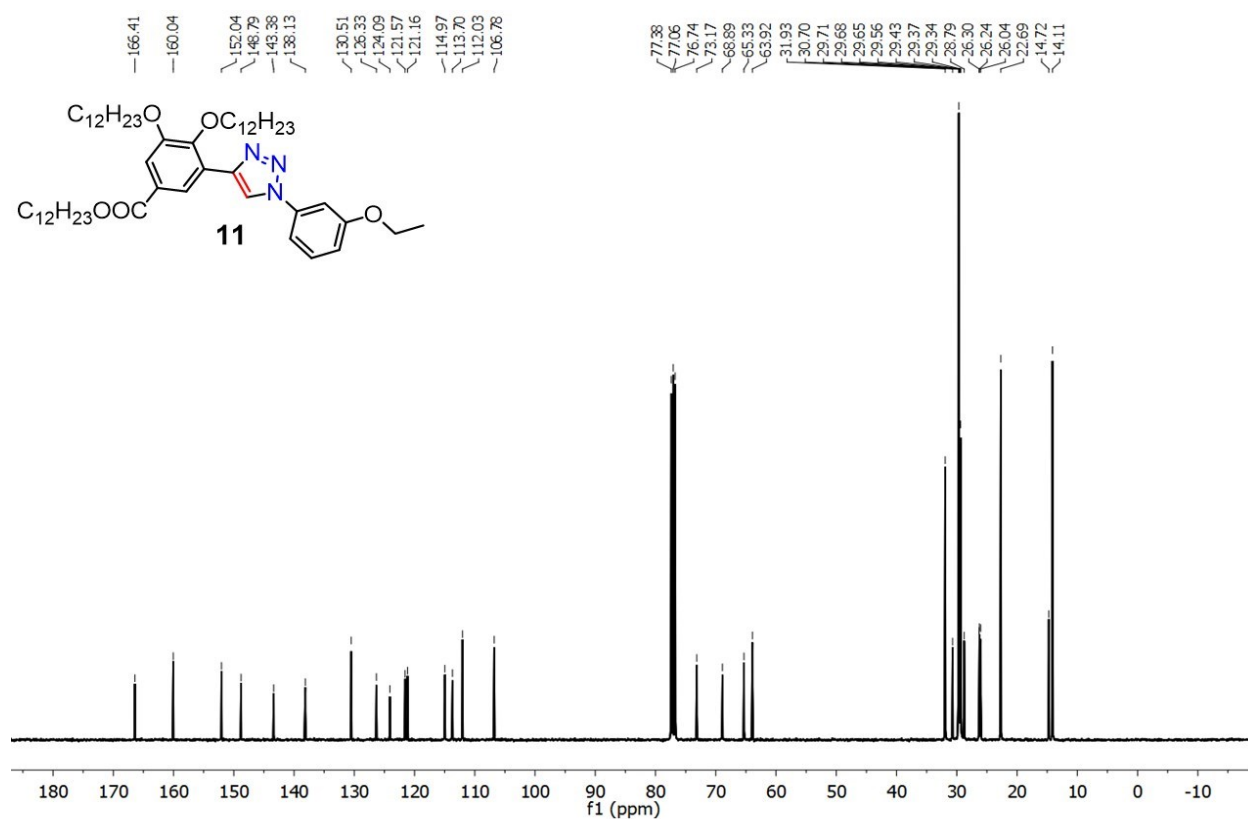

**Figure S8.** <sup>13</sup>C NMR spectrum of mono-1,2,3-triazole **11** (100 MHz, CDCl<sub>3</sub>, 25 °C).

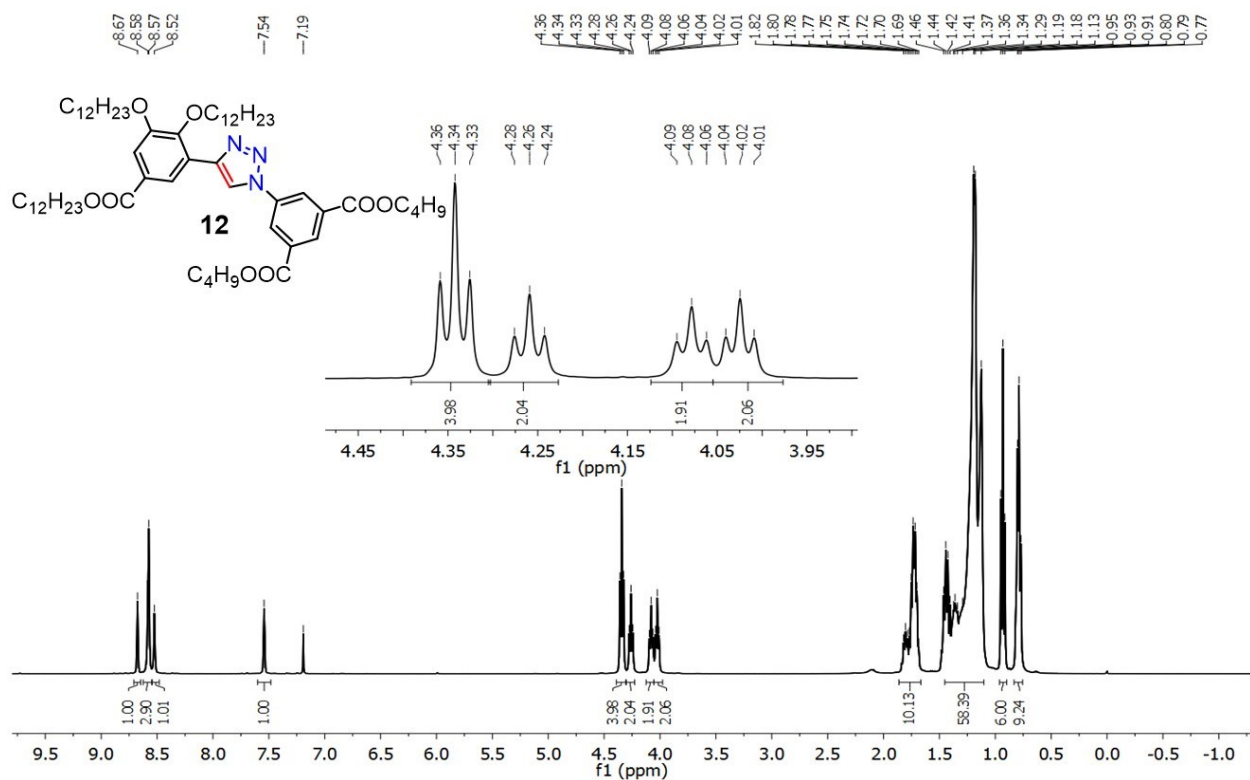

**Figure S9.** <sup>1</sup>H NMR spectrum of mono-1,2,3-triazole **12** (400 MHz, CDCl<sub>3</sub>, 25 °C).

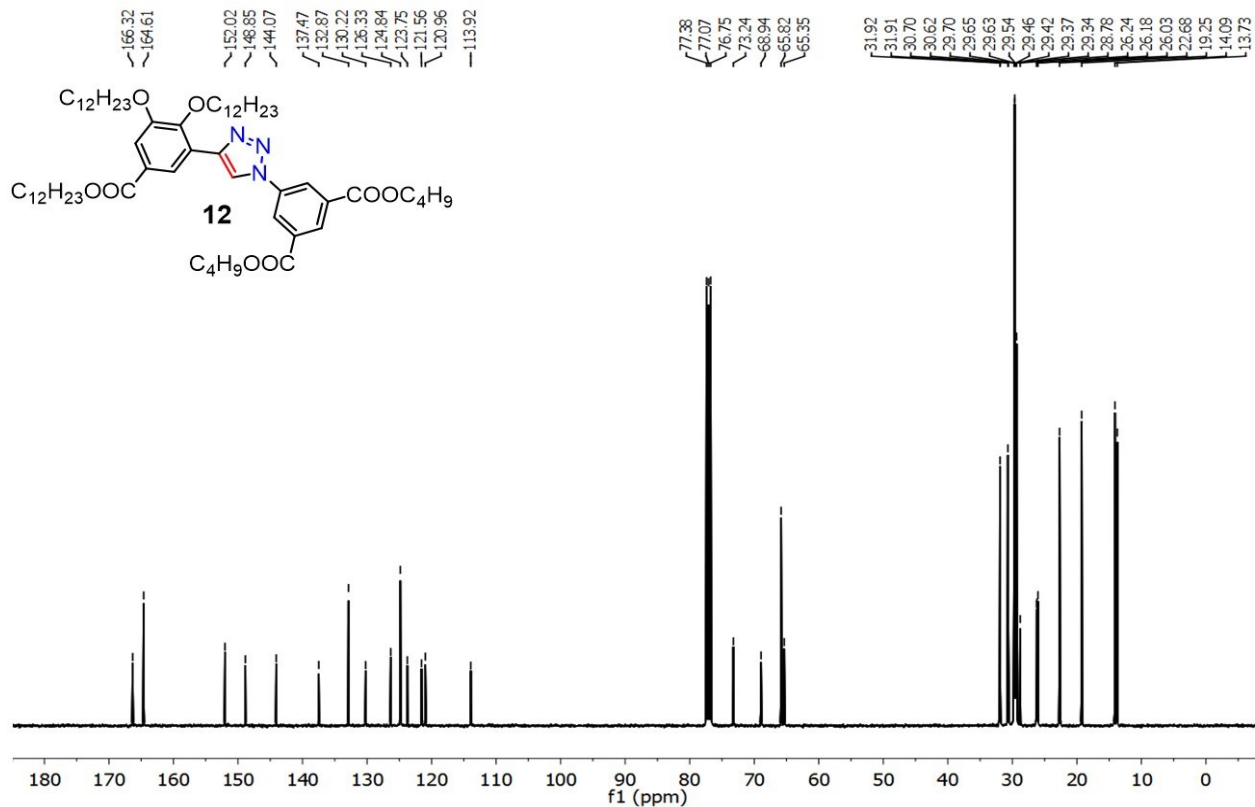

**Figure S10.** <sup>13</sup>C NMR spectrum of mono-1,2,3-triazole **12** (100 MHz, CDCl<sub>3</sub>, 25 °C).

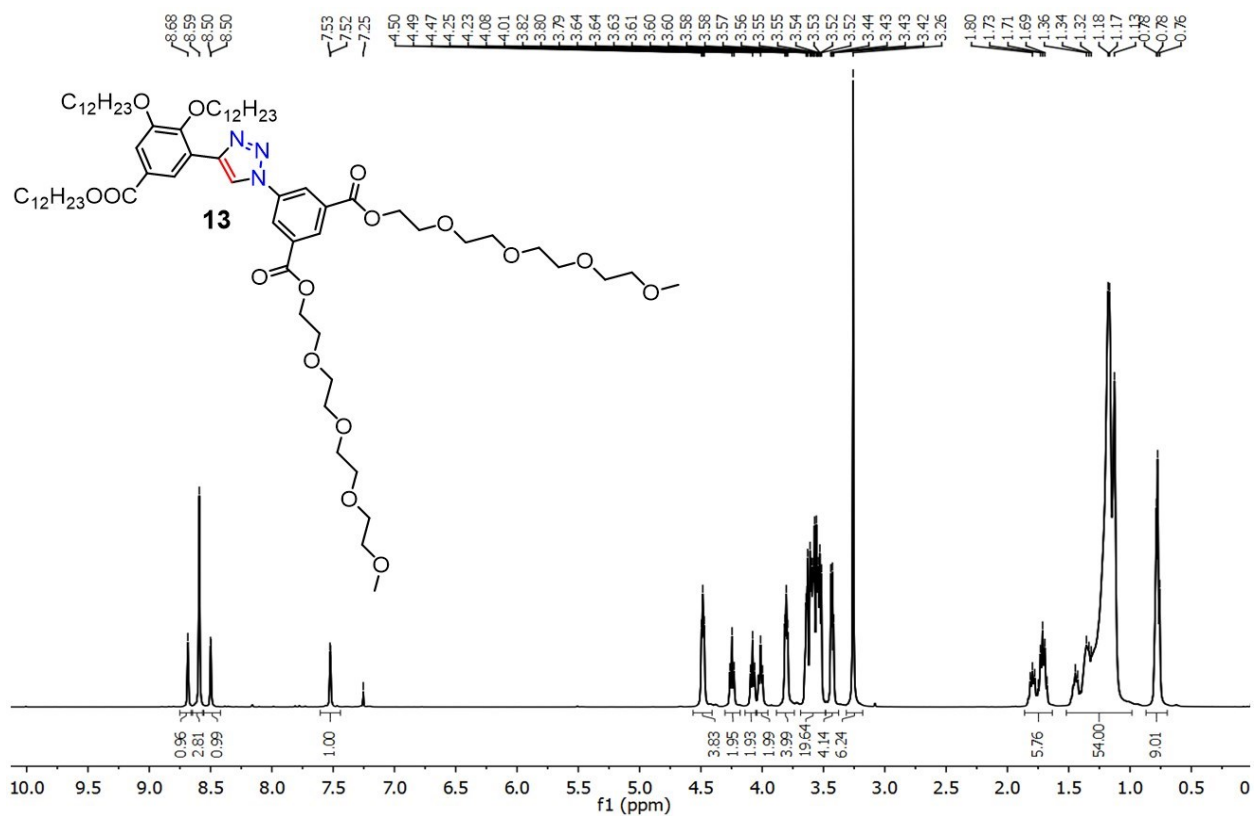

**Figure S11.**  $^1\text{H}$  NMR spectrum of mono-1,2,3-triazole **13** (400 MHz,  $\text{CDCl}_3$ , 25 °C).

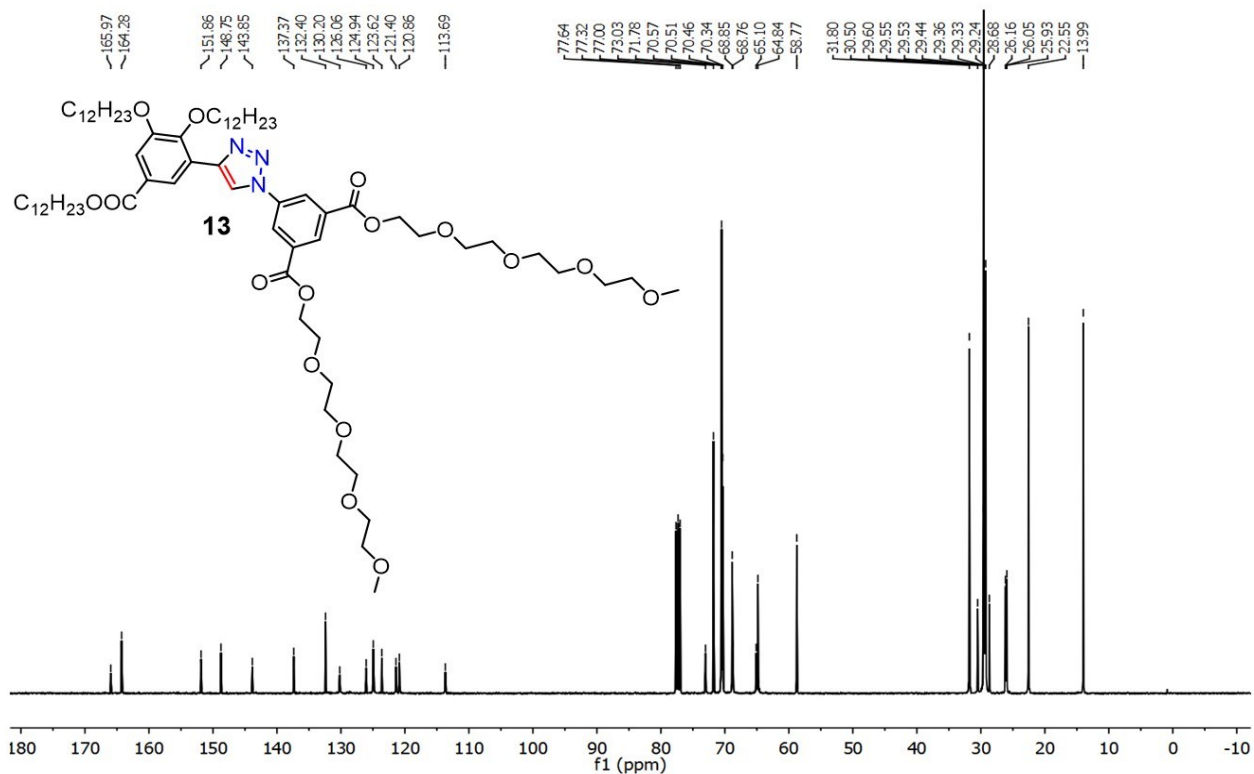

**Figure S12.**  $^{13}\text{C}$  NMR spectrum of mono-1,2,3-triazole **13** (100 MHz,  $\text{CDCl}_3$ , 25 °C).

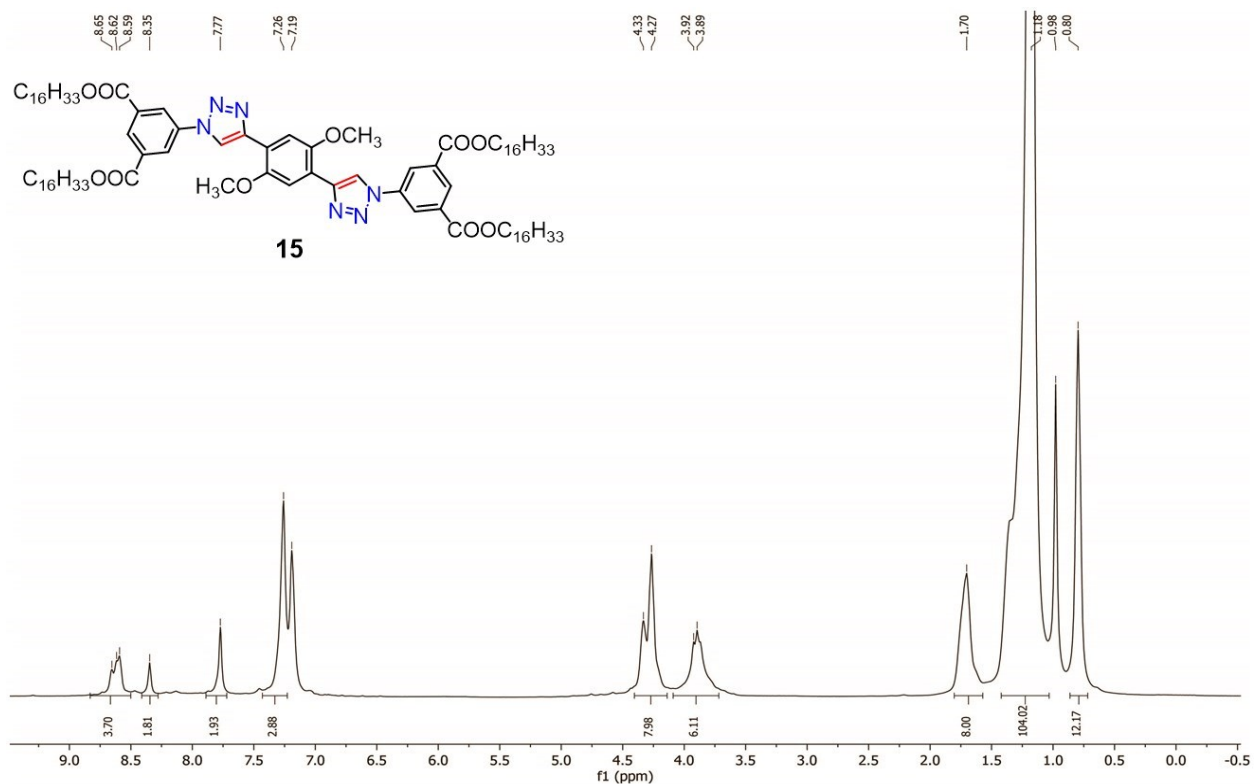

Figure S13.  $^1\text{H}$  NMR spectrum of bis-1,2,3-triazole **15** (400 MHz,  $\text{CDCl}_3$ , 25 °C).

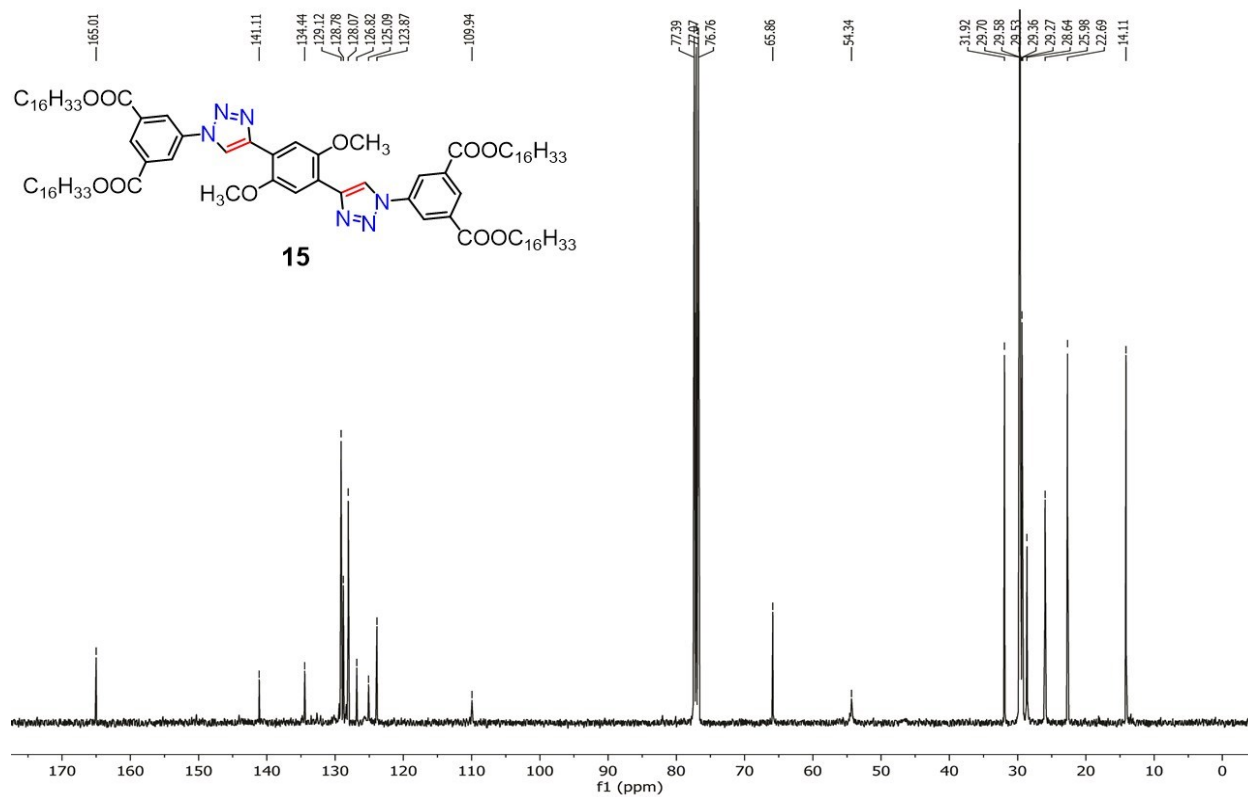

Figure S14.  $^{13}\text{C}$  NMR spectrum of bis-1,2,3-triazole **15** (100 MHz,  $\text{CDCl}_3$ , 25 °C).



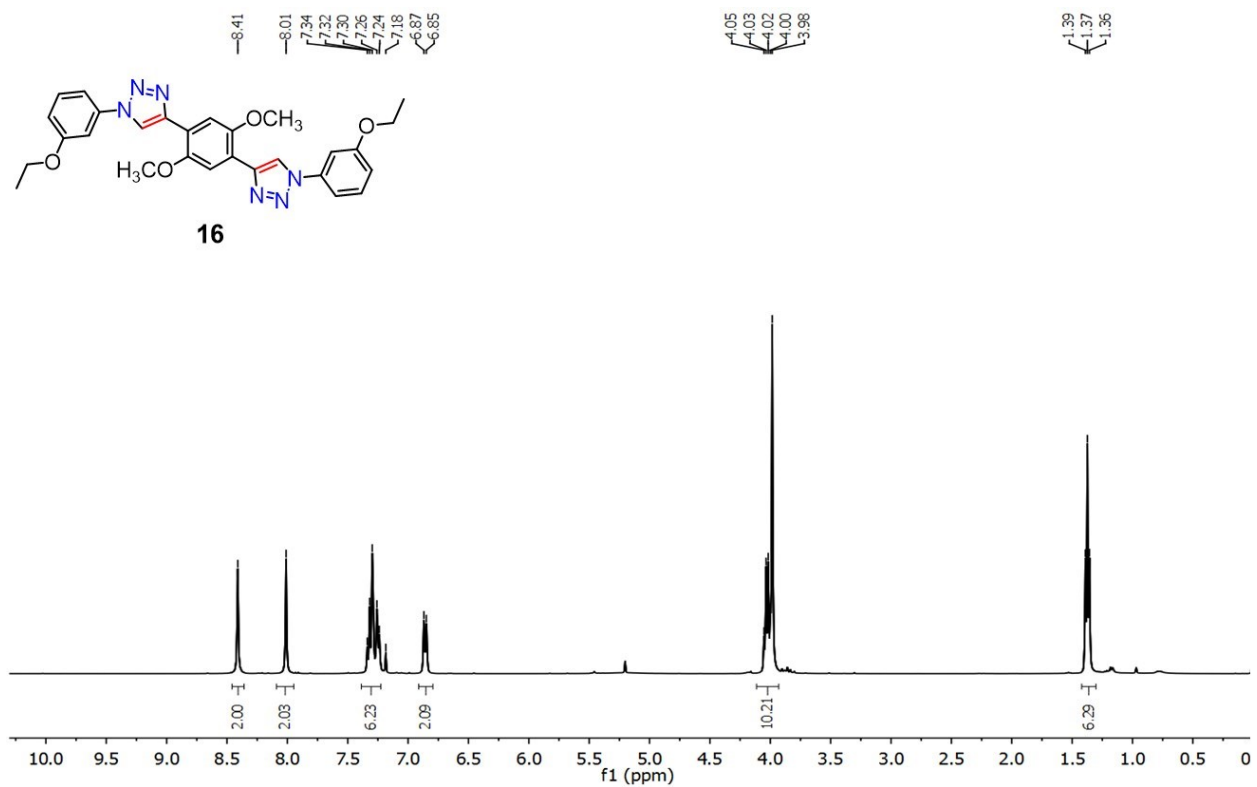

**Figure S15.**  $^1\text{H}$  NMR spectrum of bis-1,2,3-triazole **16** (400 MHz,  $\text{CDCl}_3$ , 25 °C).

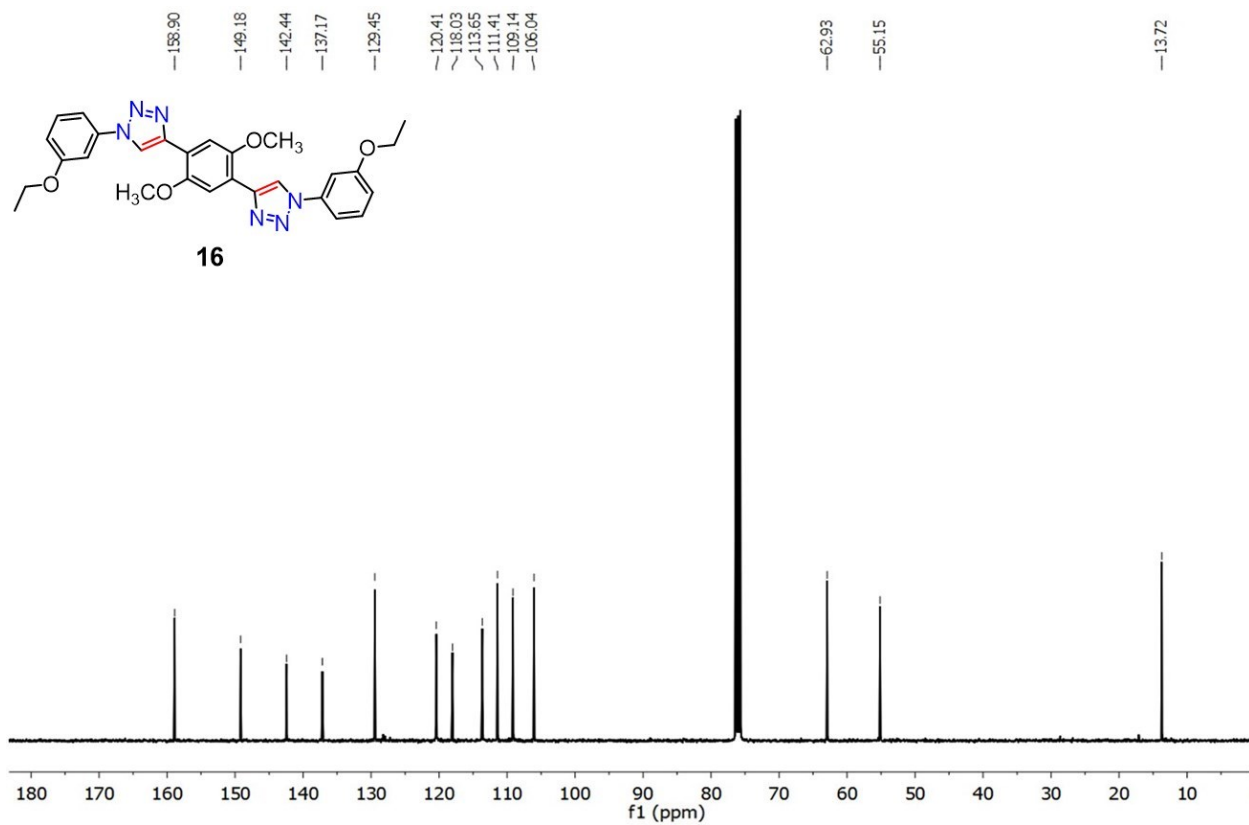

**Figure S16.**  $^{13}\text{C}$  NMR spectrum of bis-1,2,3-triazole **16** (100 MHz,  $\text{CDCl}_3$ , 25 °C).

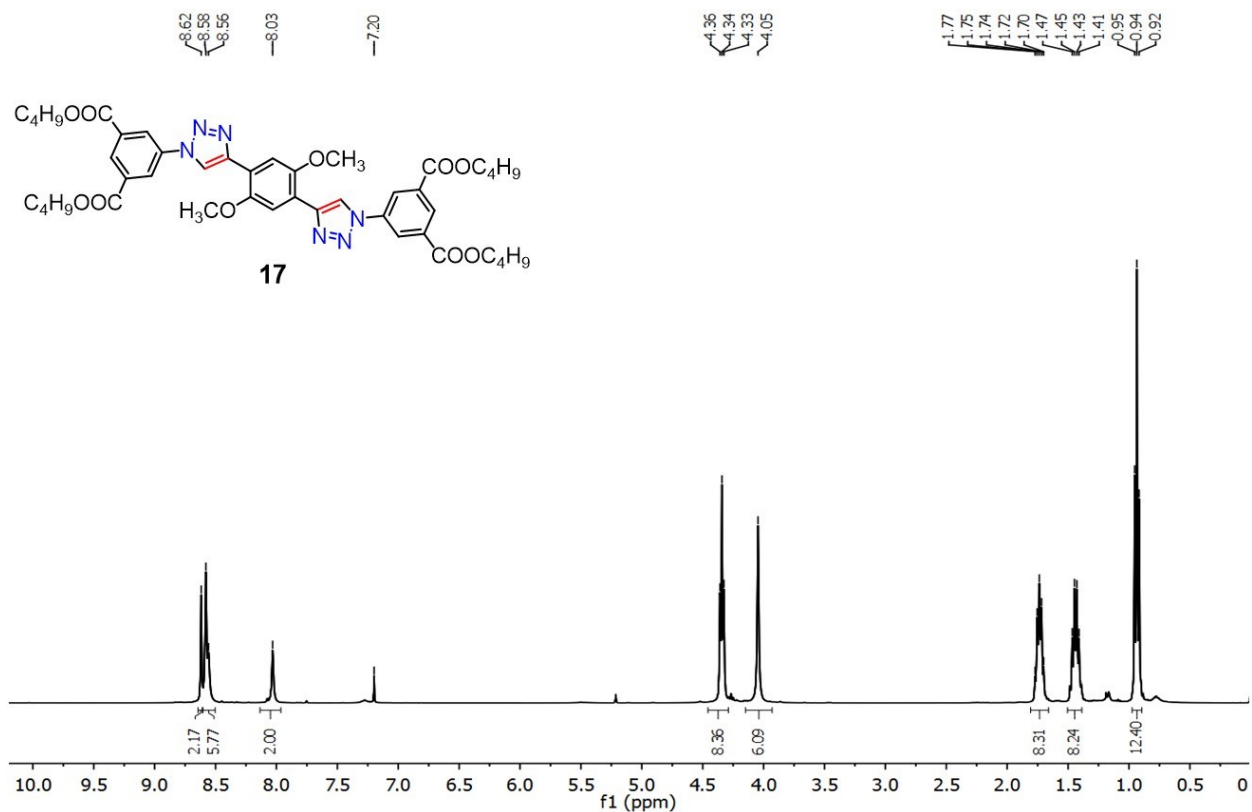

**Figure S17.**  $^1\text{H}$  NMR spectrum of bis-1,2,3-triazole **17** (400 MHz,  $\text{CDCl}_3$ , 25 °C).

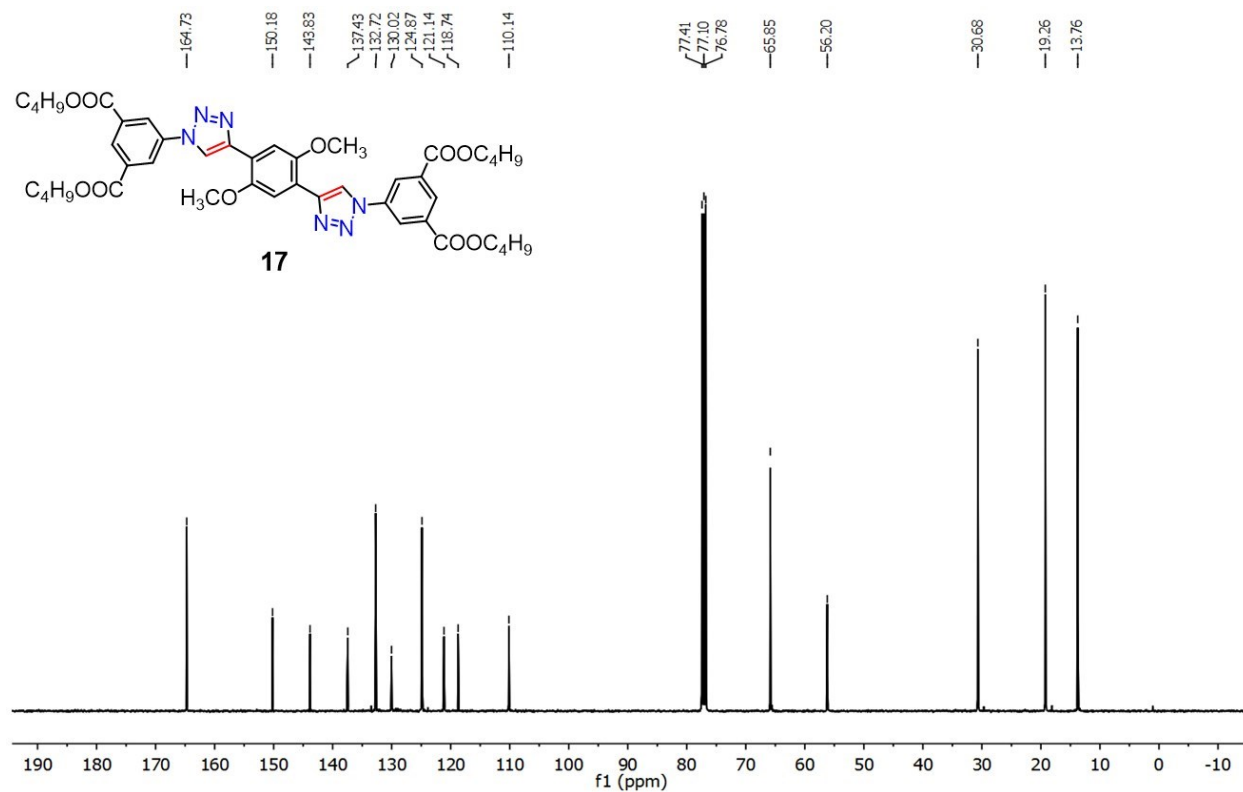

**Figure S18.**  $^{13}\text{C}$  NMR spectrum of bis-1,2,3-triazole **17** (100 MHz,  $\text{CDCl}_3$ , 25 °C).

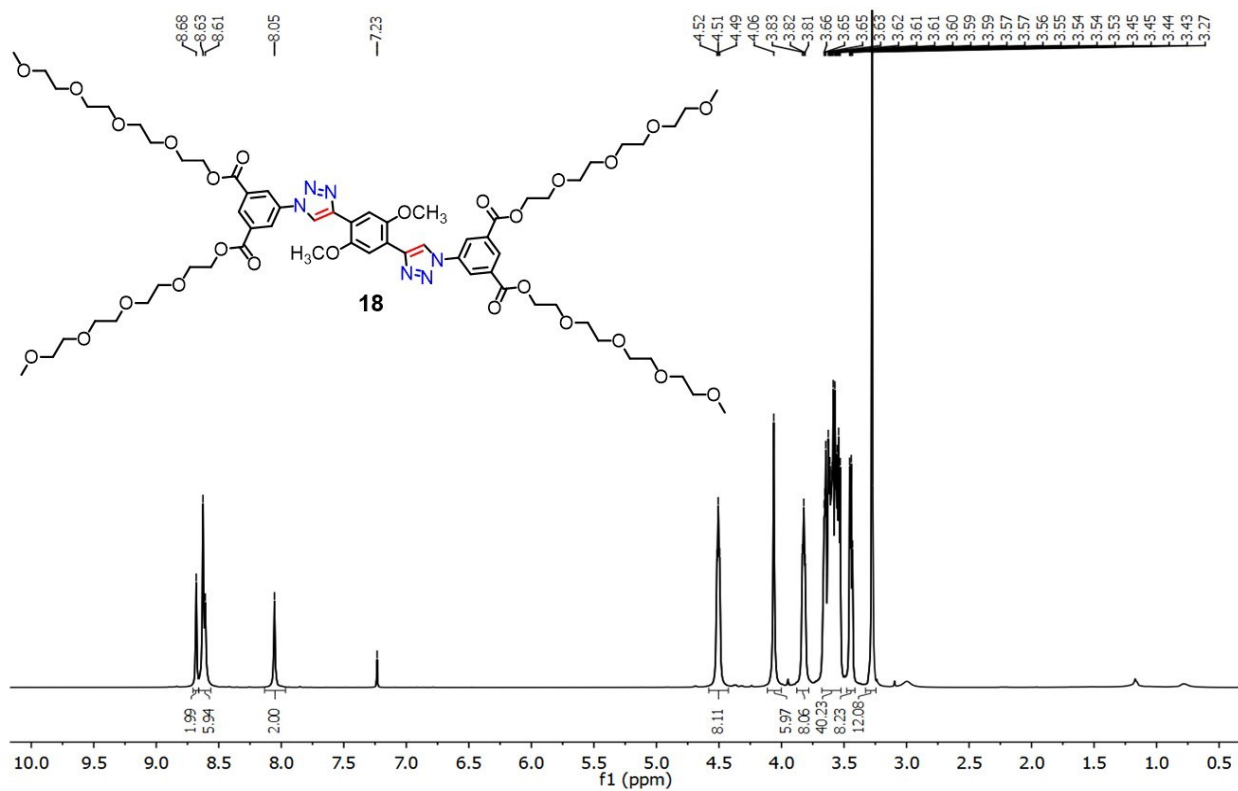

**Figure S19.**  $^1\text{H}$  NMR spectrum of bis-1,2,3-triazole **18** (400 MHz,  $\text{CDCl}_3$ , 25  $^\circ\text{C}$ ).

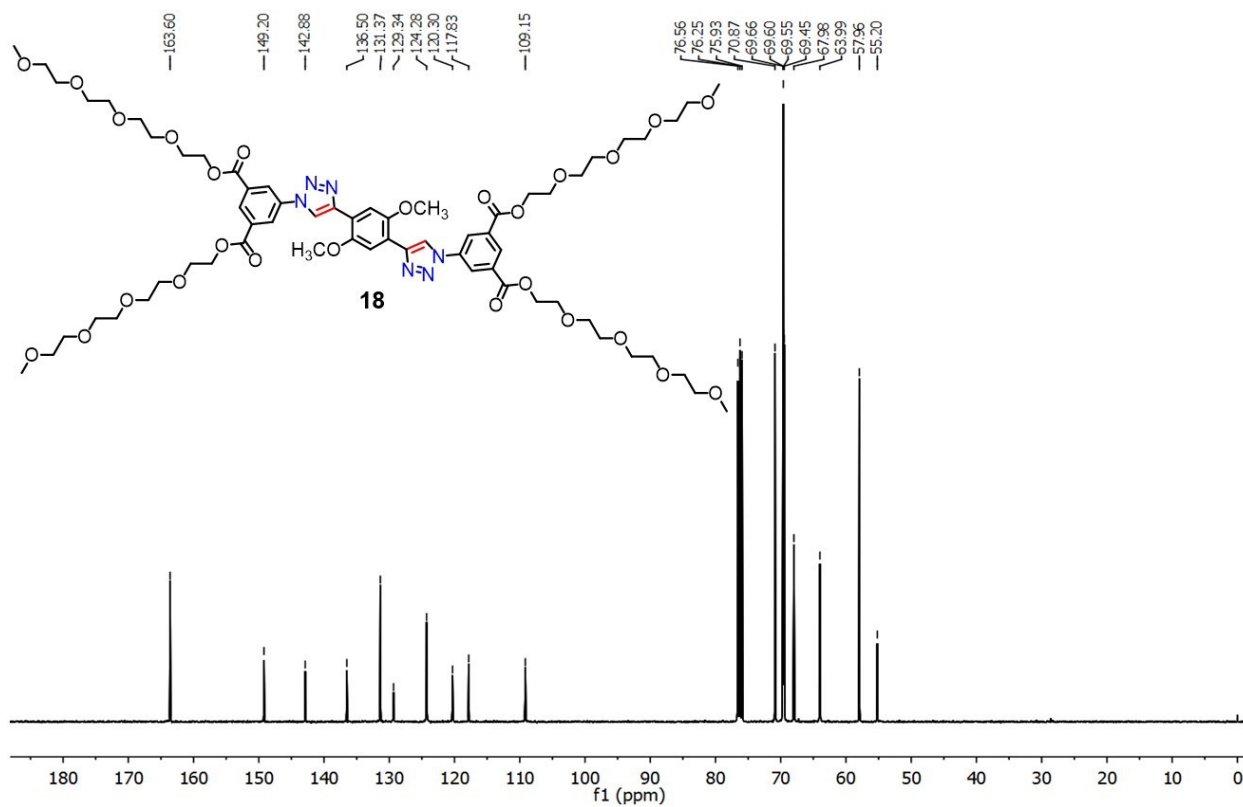

**Figure S20.**  $^{13}\text{C}$  NMR spectrum of bis-1,2,3-triazole **18** (100 MHz,  $\text{CDCl}_3$ , 25  $^\circ\text{C}$ ).

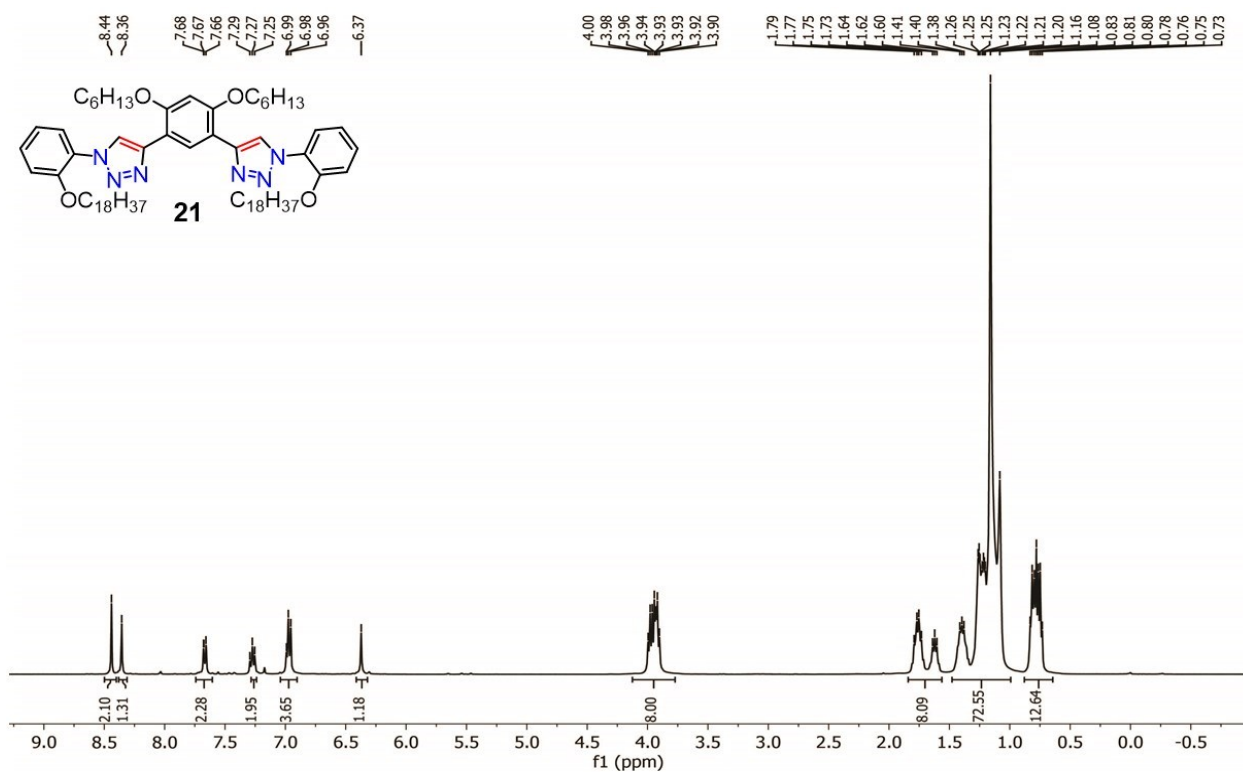

**Figure S21.**  $^1\text{H}$  NMR spectrum of bis-1,2,3-triazole **21** (400 MHz,  $\text{CDCl}_3$ , 25  $^\circ\text{C}$ ).

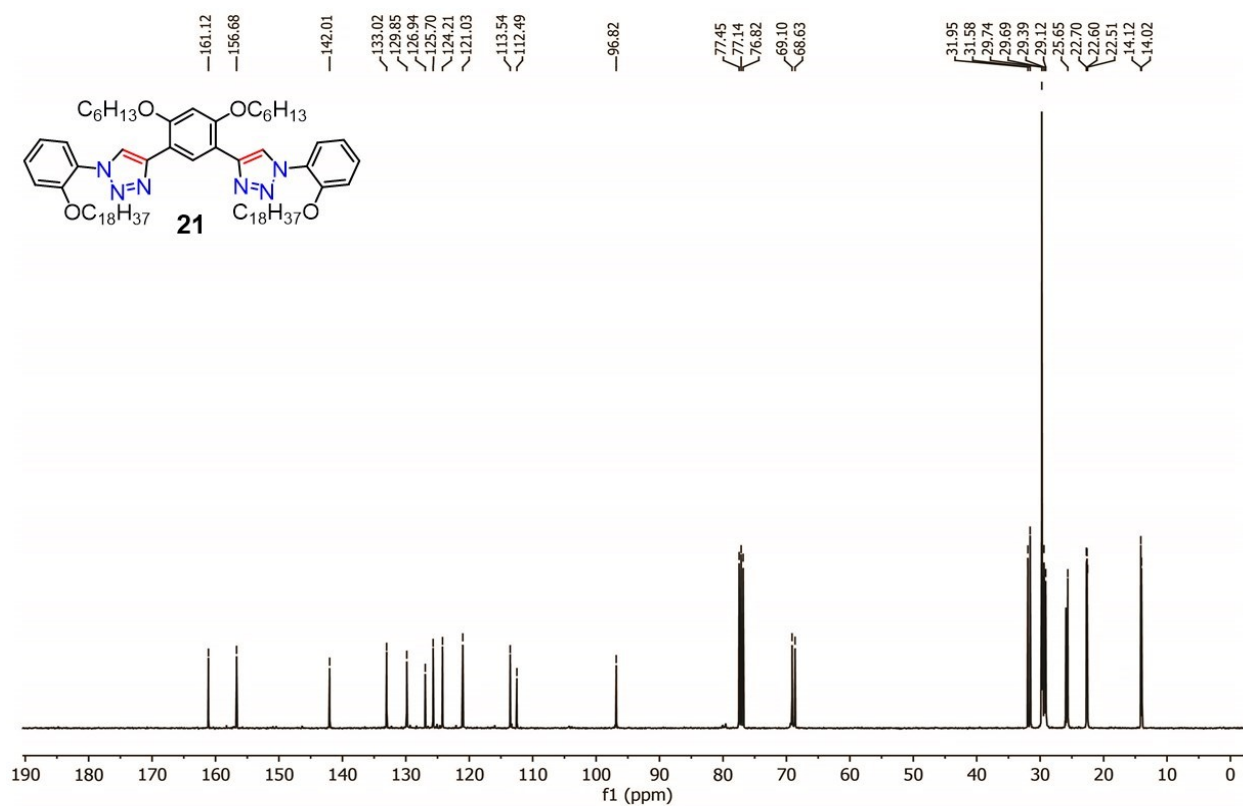

**Figure S22.**  $^{13}\text{C}$  NMR spectrum of bis-1,2,3-triazole **21** (100 MHz,  $\text{CDCl}_3$ , 25  $^\circ\text{C}$ ).
